# Supplementary material for: Yolk–shell Fe3O4@SiO2@PMO: amphiphilic magnetic nanocomposites as an adsorbent and a catalyst with high efficiency and recyclability
Source: Royal Society of Chemistry journal article supplement (doi:10.1039/c6gc02926d), 2017-01-01
Supplement: c6gc02926d1.pdf [file c6gc02926d1.pdf]

Electronic Supplementary Information

## **Yolk-Shell $\text{Fe}_3\text{O}_4@\text{SiO}_2@\text{PMO}$ : Amphiphilic Magnetic Nanocomposite as an Adsorbent and Catalyst with High Efficiency and Recyclability**

Jinyu Dai,<sup>a†</sup> Houbing Zou,<sup>a,b†</sup> Runwei Wang,<sup>a\*</sup> Yu Wang,<sup>a</sup> Zhiqiang Shi<sup>a</sup> and Shilun Qiu<sup>a</sup>

<sup>a</sup>State Key Laboratory of Inorganic Synthesis and Preparative Chemistry, College of Chemistry, Jilin University, 2699 Qianjin Street, Changchun, 130012, China

<sup>b</sup>School of Chemistry and Chemical Engineering, Shanxi University, 92 Wucheng Road, Taiyuan 030006, China

E-mail: [rwwang@jlu.edu.cn](mailto:rwwang@jlu.edu.cn).

Telephone: +86-431-85168115

Fax numbers: +86-431-85168115

## **Experimental Section**

### **Synthesis of yolk-shell structured $\text{Fe}_3\text{O}_4@\text{SiO}_2@\text{Pd}/\text{PMO}(\text{Et})$**

In a typical synthesis, the core-shell  $\text{Fe}_3\text{O}_4@\text{SiO}_2$  nanoparticles (0.1g) were dispersed in a mixture solution containing deionized water (22mL), ethanol (11mL), CTAB (0.12g) and concentrated ammonia solution (1.0mL, 28wt%) with ultrasonication treatment for 10 min, and then mechanically stirred for 30 min to form a homogeneous dispersion. Subsequently, 0.27 mL of BTEE was slowly dropwise added to dispersion under continuous stirring. The reaction mixture was stirred for 2h at room temperature. After completely condensation of BTEE, the mixture was transferred to a stainless steel autoclave with a Teflon container and hydrothermally treated at 100°C for 24h. After cooling down to room temperature, the orange precipitate was collected by a magnet. Finally, the surfactant CTAB was removed by refluxing in ethanol solution containing  $\text{NH}_4\text{NO}_3$  for three times at 5 h each time.

Pd nanoparticles were loaded into the yolk-shell structured  $\text{Fe}_3\text{O}_4@\text{SiO}_2@\text{PMO}(\text{Et})$  materials using impregnation and reduction. A certain amount of  $\text{Fe}_3\text{O}_4@\text{SiO}_2@\text{PMO}(\text{Et})$  was added into 20 mL of 0.0075 M  $\text{Na}_2\text{PdCl}_4$  aqueous solution with stirring for 24h at room temperature, and 0.2 mL of 0.1M  $\text{NaBH}_4$  solution was added dropwise, and the mixture was stirred at the room temperature for 2h. Finally, the obtained magnetic catalysts were collected by a magnet and washed with deionized water and ethanol several times.

### **Synthesis of yolk-shell structured $\text{Fe}_3\text{O}_4 @\text{SiO}_2 @\text{NH}_2\text{-PMO}(\text{Ph})$**

In a typical synthesis, the core-shell  $\text{Fe}_3\text{O}_4 @\text{SiO}_2$  nanoparticles (0.1g) were dispersed in a mixture solution containing deionized water (22mL), ethanol (11mL), CTAB (0.12g) and concentrated ammonia solution (1.0mL, 28wt%) with ultrasonication treatment for 10 min, and then mechanically stirred for 30 min to form a homogeneous dispersion. Subsequently, 0.22 mL of BTEB and 0.033mL of APTES were slowly dropwise added to dispersion under continuous stirring. The reaction mixture was stirred for 2h at room temperature. After completely co-condensation of BTEB and APTES, the mixture was transferred to a stainless steel autoclave with a Teflon container and hydrothermally treated at 100°C for 24h. After cooling down to room temperature,

the orange precipitate was collected by a magnet. Finally, the surfactant CTAB was removed by refluxing in ethanol solution containing  $\text{NH}_4\text{NO}_3$  for three times at 5 h each time.

#### Loading Pd nanoparticles into $\text{Fe}_3\text{O}_4 @\text{SiO}_2 @\text{NH}_2\text{-PMO(Ph)}$ for magnetic catalysts

Pd nanoparticles were loaded into the yolk-shell structured  $\text{Fe}_3\text{O}_4 @\text{SiO}_2 @\text{NH}_2\text{-PMO(Ph)}$  materials via an in situ reduction method. A certain amount of  $\text{Fe}_3\text{O}_4 @\text{SiO}_2 @\text{NH}_2\text{-PMO(Ph)}$  was added into 20 mL of 0.0075 M  $\text{Na}_2\text{PdCl}_4$  aqueous solution with stirring for 24h at room temperature, and 0.2 mL of 0.1M  $\text{NaBH}_4$  solution was added dropwise, and the mixture was stirred at the room temperature for 2h. Finally, the obtained magnetic catalysts were collected by a magnet and washed with deionized water and ethanol several times.

## Supplementary Figures and Legends

Table S1 The Pd binding energy of Pd-SH and  $\text{Na}_2\text{PdCl}_4$ .

| Sample                             | $3d_{3/2}$ | $3d_{5/2}$ |
|------------------------------------|------------|------------|
| $\text{Na}_2\text{PdCl}_4$         | 343.6eV    | 338.5eV    |
| $\text{Pd}^{2+}\text{-HS-PMO(Et)}$ | 343.5eV    | 338.2eV    |
| $\text{Pd NPs-HS-PMO(Et)}$         | 342.1eV    | 336.8eV    |
| $\text{Pd NPs}$                    | 341.2eV    | 335.9eV    |

Table S2  $\text{Pd}^{2+}$  Adsorption behavior of adsorbents in a homoionic solution.

| Adsorbent                                                     | Uptake/% | $K_d/(\text{mL g}^{-1})$ |
|---------------------------------------------------------------|----------|--------------------------|
| $\text{Fe}_3\text{O}_4 @\text{SiO}_2 @\text{HS-PMO}$          | 99.97    | $3.23 \times 10^6$       |
| $\text{Fe}_3\text{O}_4 @\text{SiO}_2 @\text{NH}_2\text{-PMO}$ | 97.46    | $3.76 \times 10^4$       |

$K_d (\text{mL g}^{-1}) = \text{concentration of metal ion in the adsorbent (mmol g}^{-1}) / \text{concentration of metal ion in an aqueous solution (mmol mL}^{-1})$

Table S3 Textural parameters of Yolk-Shell  $\text{Fe}_3\text{O}_4 @\text{SiO}_2 @\text{PMO}$

| Sample (PMO Shell)           | BET surface area ( $\text{m}^2\text{g}^{-1}$ ) | Pore volume ( $\text{cm}^3\text{g}^{-1}$ ) | Pore size (nm) |
|------------------------------|------------------------------------------------|--------------------------------------------|----------------|
| $\text{PMO(Et)}$             | 635                                            | 0.39                                       | 2.3            |
| $\text{HS-PMO(Et)}$          | 480                                            | 0.30                                       | 2.1            |
| $\text{PMO(Ph)}$             | 793                                            | 0.46                                       | 2.3            |
| $\text{NH}_2\text{-PMO(Ph)}$ | 649                                            | 0.32                                       | 2.0            |
| $\text{HS-PMO(Ph)}$          | 599                                            | 0.34                                       | 2.2            |

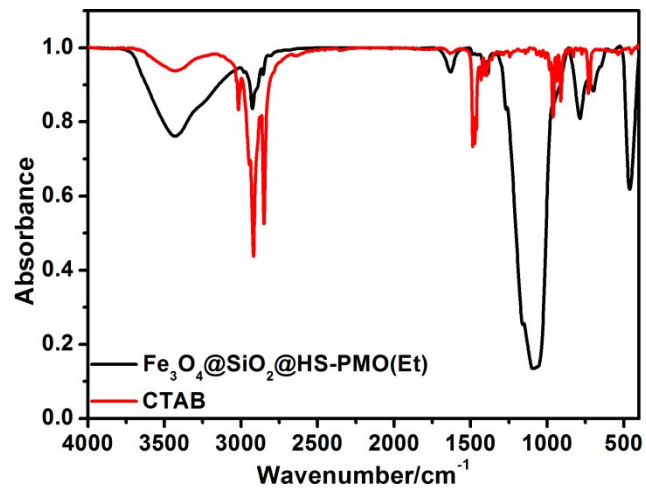

Fig.S1 FT-IR spectra of  $\text{Fe}_3\text{O}_4@\text{SiO}_2@\text{HS-PMO}(\text{Et})$  and CTAB.

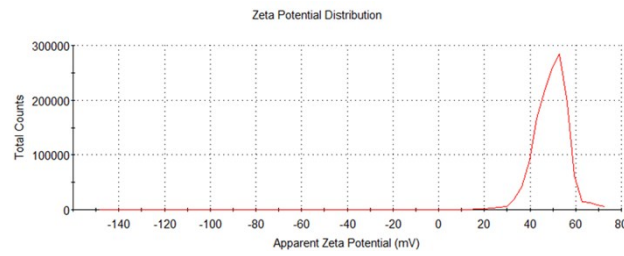

Fig.S2 Zeta potential spectrum of  $\text{Fe}_3\text{O}_4@\text{SiO}_2@\text{HS-PMO}(\text{Et})$ .

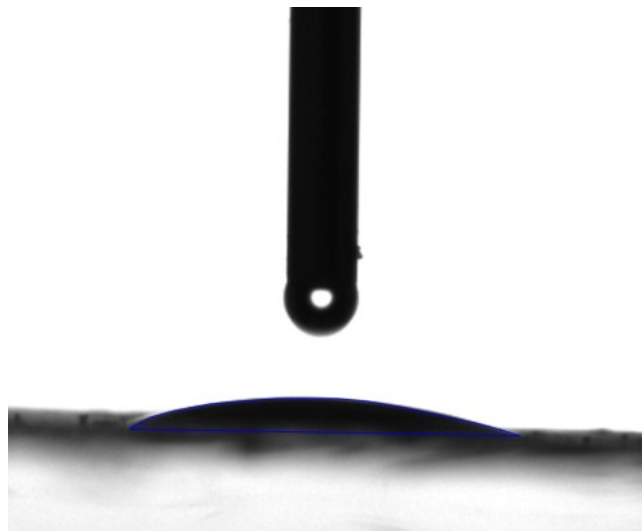

Fig.S3 Water contact-angle of  $\text{Fe}_3\text{O}_4@\text{SiO}_2@\text{HS-PMO}(\text{Et})$ .

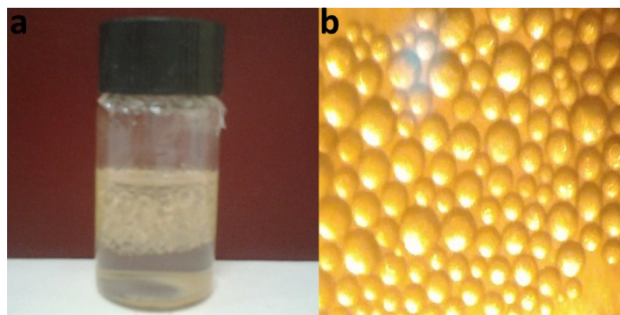

Fig.S4 (a) Digital photograph of the water in oil emulsion of the toluene-water system obtained through extracting the magnetic amphiphilic nanocomposite in water using toluene. (b) Microphotograph of the water in oil emulsion in (a).

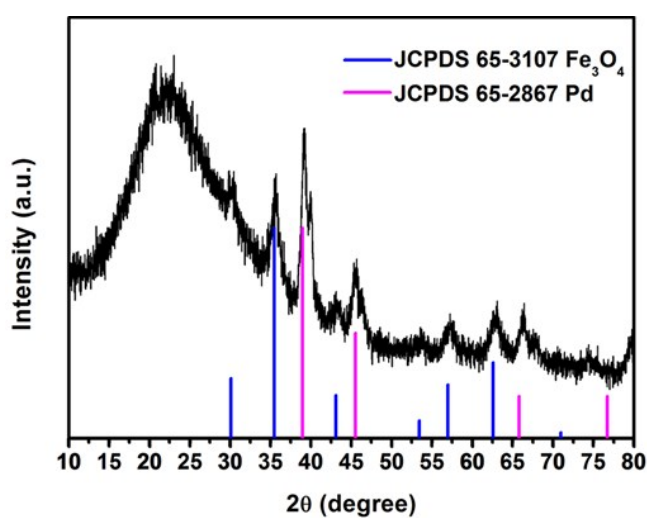

Fig.S5 Wide-angle XRD patterns of  $\text{Fe}_3\text{O}_4@SiO_2@Pd/HS-PMO(Et)$ .

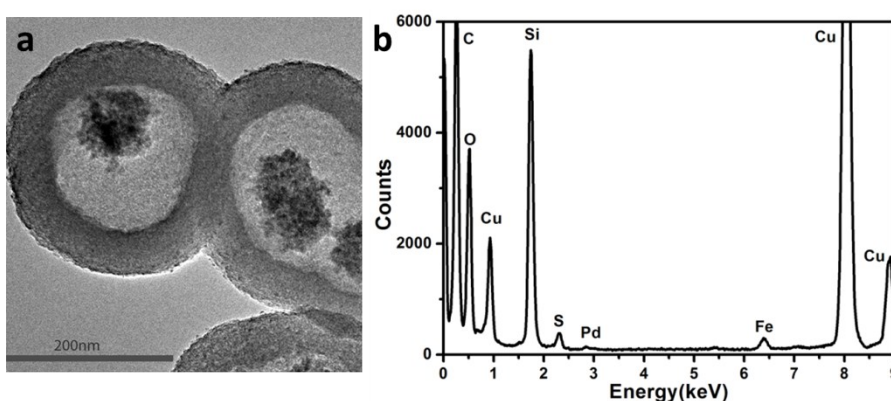

Fig.S6 (a) TEM image and (b) EDS spectra of  $\text{Fe}_3\text{O}_4@SiO_2@Pd/HS-PMO(Et)$  recovered after successive recycling ten times for oxidation of 4-methoxybenzyl alcohol.

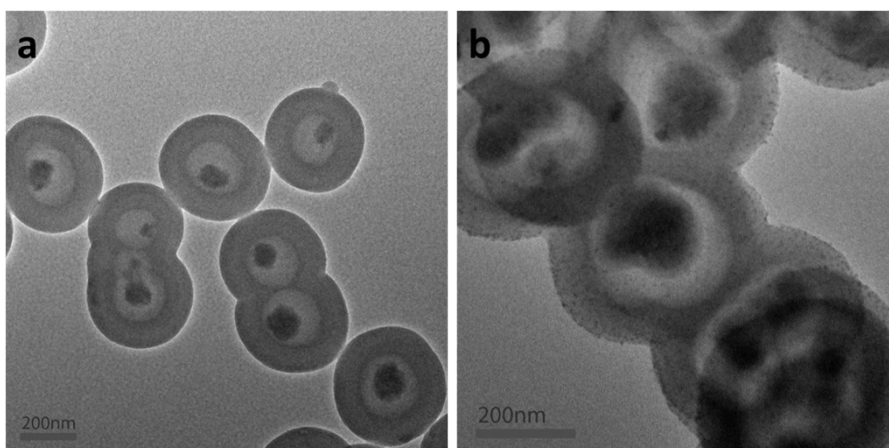

Fig.S7 TEM images of (a)  $\text{Fe}_3\text{O}_4@\text{SiO}_2@\text{NH}_2\text{-PMO(Ph)}$  and (b)  $\text{Fe}_3\text{O}_4@\text{SiO}_2@\text{Pd/NH}_2\text{-PMO(Ph)}$ .
